# Supplementary material for: Conversion of carbon black recovered from waste tires into activated carbon via chemical/microwave methods for efficient removal of heavy metal ions from wastewater
Source: Royal Society of Chemistry journal article supplement (doi:10.1039/d4ra00172a), 2024-01-01
Supplement: d4ra00172a1.pdf [file d4ra00172a1.pdf]

## **Supplementary Information**

### **Conversion of recovered carbon black from waste tire to activated carbon via chemical/microwave methods for efficient removal of heavy metal ions from wastewater**

**M. M. El-Maadawy<sup>1</sup>, Amir A. Elzoghby\*<sup>1</sup>, Ahmed M. Masoud\*<sup>1</sup>, Zahraa M. El-Deeb<sup>2</sup>,  
Ahmed M. A. El Naggar<sup>3</sup>, Mohamed H. Taha<sup>1</sup>**

<sup>1</sup> *Nuclear Materials Authority, P.O. Box 530, El Maddi, Cairo, Egypt*

<sup>2</sup> *Chemistry Department, Faculty of Science, Mansoura University, Mansoura, Egypt*

<sup>3</sup> *Egyptian Petroleum Research Institute (EPRI), 1 Ahmed El-Zomor St., Nasr City, Cairo, Egypt*

\* Corresponding author: [amirelzoghby33@gmail.com](mailto:amirelzoghby33@gmail.com) , [chemmaso010@hotmail.com](mailto:chemmaso010@hotmail.com)

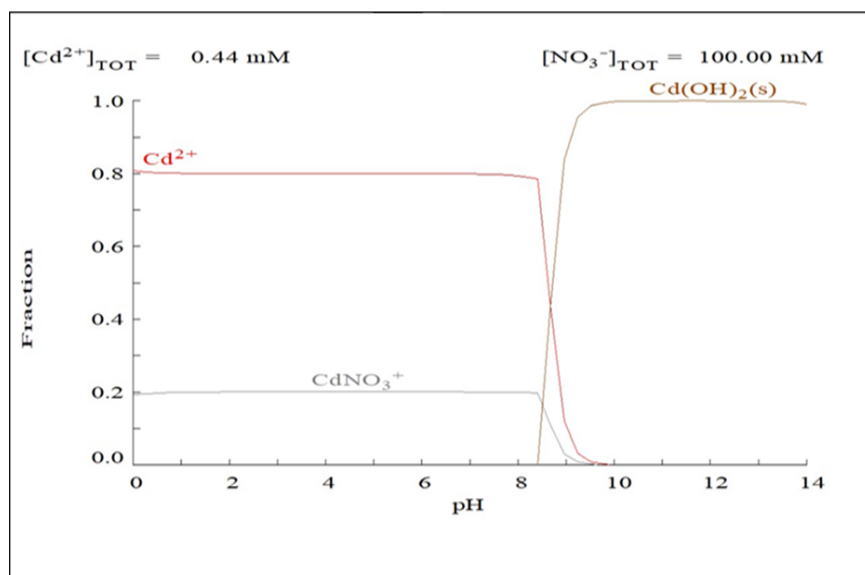

**Figure S1:** Expected aqueous speciation of Cd(II) concentration (50 mg L<sup>-1</sup>) as a function of pH in 0.1 M HNO<sub>3</sub> using Medusa/Hydra program.

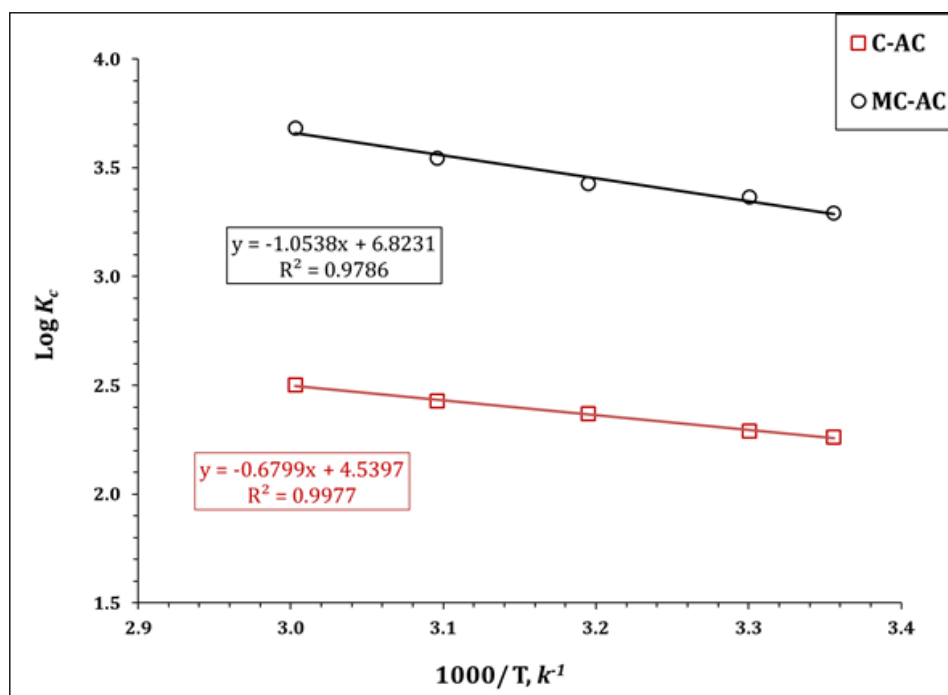

**Figure S2:** Van't Hoff plot for Cd(II) sorption onto C-AC and MC-AC sorbents.

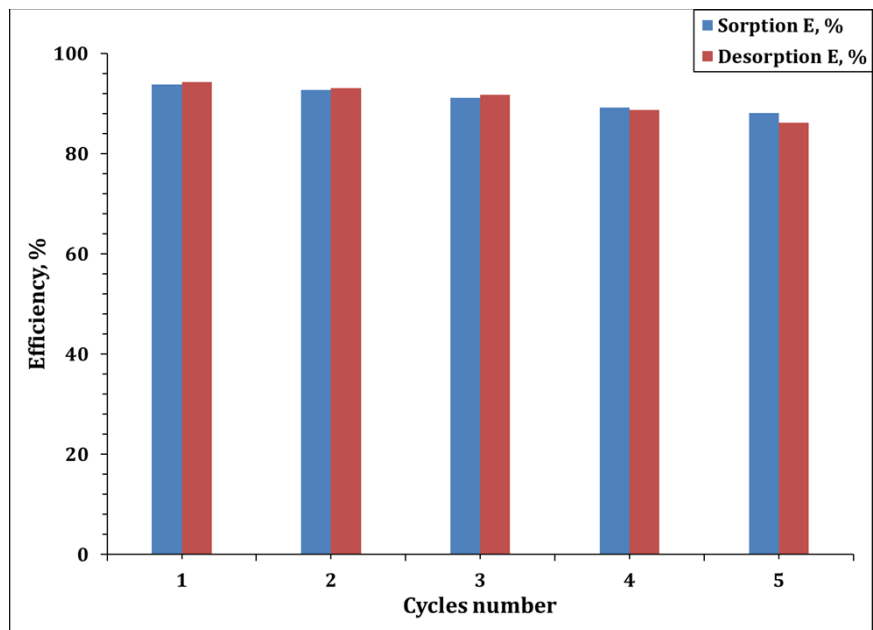

**Figure S3:** Recycling investigation for Cd(II) uptake using MC-AC sorbent.

**Table S1: Kinetics, isotherm, and thermodynamics equations for Cd(II) ions adsorption of [1-5]**

| Kinetics                             | Equations                                                            |
|--------------------------------------|----------------------------------------------------------------------|
| Pseudo-first-order                   | $\text{Log} (q_e - q_t) = \text{Log} q_e - \frac{K_1}{2.303} t$      |
| Pseudo-second-order                  | $\left(\frac{t}{q_t}\right) = \frac{1}{K_2 q_e^2} + \frac{1}{q_e} t$ |
| Intra-particle diffusion model (IPD) | $q_t = K_{id} t^{0.5} + C_i$                                         |
| Isotherms                            | Equations                                                            |
| Langmuir model                       | $C_e/q_e = (1/K_L q_{max}) + [C_e/q_m]$                              |
| Freundlich model                     | $\ln q_e = \ln K_F + \left[\frac{1}{n}\right] \ln C_e$               |
| Temkin model                         | $q_e = \frac{RT}{b_T} \ln K_T C_e$                                   |
| Thermodynamics                       | Equations                                                            |
|                                      | $\log K_C = -\frac{\Delta H^o}{2.303 R} X \frac{1}{T} + C$           |
|                                      | $-\Delta G^o = 2.303 RT \log K_C$                                    |
|                                      | $\Delta G^o = \Delta H^o - T \Delta S^o$                             |

$q_e$  (mg g<sup>-1</sup>) is the equilibrium concentration of Cd(II) ions, and  $q_t$  (mg g<sup>-1</sup>) is the adsorbed amount of Cd(II) ions after time  $t$  (min),  $k_1$  (min<sup>-1</sup>) and  $k_2$  (min<sup>-1</sup>) are the rate constants for the pseudo first and second order, respectively.  $K_{id}$  (mg/g. min<sup>0.5</sup>) is a rate constant, and  $C$  is the thickness of the boundary layer.  $C_e$  (mg L<sup>-1</sup>) is equilibrium concentration of Cd(II) ions,  $q_{max}$  (mg g<sup>-1</sup>) is the theoretical adsorption capacity,  $K_L$  is Langmuir constant,  $K_F$  and  $n$  are Freundlich constants.  $b_T$  is Temkin constant that refers to the adsorption heat, and  $K_T$  (L min<sup>-1</sup>) is the equilibrium binding constant.  $K_C$  is a non-dimensional equilibrium constant and it equals  $K_d \times 1000 \times \rho$  [1];  $T$  is the temperature (K),  $R$  is the universal gas constant (8.314 J mol<sup>-1</sup>. K<sup>-1</sup>),  $\rho$  is solution density g/L, and  $C$  is a constant.

- [1] L. Largitte, R. Pasquier, A review of the kinetics adsorption models and their application to the adsorption of lead by an activated carbon, Chem. Eng. Res. Des. 109 (2016) 495–504. <https://doi.org/10.1016/J.CHERD.2016.02.006>.
- [2] Y.S. Kim, J.H. Kim, Isotherm, kinetic and thermodynamic studies on the adsorption of paclitaxel onto Sylopute, J. Chem. Thermodyn. 130 (2019) 104–113. <https://doi.org/10.1016/J.JCT.2018.10.005>.
- [3] K.Y. Foo, B.H. Hameed, Insights into the modeling of adsorption isotherm systems, Chem. Eng. J. 156 (2010) 2–10. <https://doi.org/10.1016/J.CEJ.2009.09.013>.
- [4] A.M. Masoud, Sorption behavior of uranium from Sulfate media using purolite A400 as a strong base anion Exchange resin, Int. J. Environ. Anal. Chem. (2020). <https://doi.org/10.1080/03067319.2020.1763974>.
- [5] P. Saha, S. Chowdhury, Insight Into Adsorption Thermodynamics, Thermodynamics. (2011). <https://doi.org/10.5772/13474>.



**Table S2:** *Cd(II)* recovery from loaded MC-AC sorbent using different solutions (5.0 g/L, room temperature; 240 min).

| <b>Desorption investigation</b> |                         |          |
|---------------------------------|-------------------------|----------|
| <b>Eluent Type</b>              | <b>Concentration, M</b> | <b>%</b> |
| Hydrochloric acid               | 0.5                     | 93.5     |
| Sulfuric acid                   | 0.5                     | 74.4     |
| Nitric acid                     | 0.5                     | 56.2     |
